# Supplementary material
Source: HighWire-hosted journal article supplement (https://www.cmajopen.ca/content/suppl/2022/09/20/10.3.E818)
Supplement: 2021-0328-2-at.pdf [file 2021-0328-2-at.pdf]

## Appendix 2

Appendix 2a. Criteria for highest level of care for people with COVID-19 in British Columbia and Ontario

Appendix 2b. Matching strategy for people with COVID-19 and controls in British Columbia and Ontario

Appendix 2c. Determination of place of residence at index date for people with COVID-19 and controls in British Columbia and Ontario

Appendix 2d. Comorbidity

Appendix 2e. Variables describing residence and socioeconomic factors in British Columbia and Ontario

Appendix 2f. Resources and costing methods in British Columbia and Ontario

Figure S1. Cohort selection process: a) in British Columbia, b) in Ontario

Figure S2. Transitions from place of residence at index date to level of care for people with COVID-19, in a) British Columbia, b) Ontario

Figure S3. Kaplan-Meier survival curves for a) British Columbia, and b) Ontario

Table S1. Characteristics of people with COVID-19 and matched controls for each level of care: a) British Columbia, b) Ontario

Table S2. Number and percentage of people with COVID-19 who were censored or died in each 30-day period in British Columbia and Ontario.

Table S3. Mean and median per person cost for each 30-day period before and after index date for people with COVID-19 by highest level of care, and matched controls, in a) British Columbia b) Ontario.

Table S4. Mean cumulative net costs by level of care for people with COVID-19 in British Columbia and Ontario.

Table S5. Mean net costs for people with COVID-19 during the first 30 days after index date, stratified by level of care and characteristics at index date, in British Columbia and Ontario.

## Appendix 2a) Criteria for highest level of care for people with COVID-19 in British Columbia and Ontario

| Location of highest level of care                     | Database            | Variables assessed                                                                                                                                                                                                                                                                                                                                                                                       |
|-------------------------------------------------------|---------------------|----------------------------------------------------------------------------------------------------------------------------------------------------------------------------------------------------------------------------------------------------------------------------------------------------------------------------------------------------------------------------------------------------------|
| Hospitalized with ICU (ICU) in Ontario and BC         | DAD                 | Hospitalization with ICU admission between 1 day before index date and 14 days after index date.<br><br>To ensure that the ICU stay is due to COVID-19, the ICU stay must start between 1 day prior to the positive test (i.e. patient was admitted to the ICU and then tested positive) and 14 days after the positive test (i.e. patient tested positive and then admitted to the ICU within 14 days). |
| Hospitalized with no ICU (hospital) in Ontario and BC | DAD                 | Hospitalization with no ICU admission between 1 day before and 14 days after index date. Includes patients who were infected while already in the hospital as well as those admitted to the hospital after infection.                                                                                                                                                                                    |
| LTC in Ontario*                                       | CCRS<br>ODB<br>OHIP | At least one of the following:<br>CCRS: Admission date with no discharge date before Index date;<br>ODB: LTC flag on prescription in ODB, within 90 days before Index date<br>OHIP record with fee code beginning with 'W' within 90 days before index date and the institution code in the OHIP claim having a type of NH (nursing home) or HF (home for the aged).                                     |
| LTC in BC*                                            | HCC-MRR             | Resident of facility care with no service end date before index date.                                                                                                                                                                                                                                                                                                                                    |
| Community in Ontario and BC                           | -                   | Does not meet criteria for any of the above for each respective province.                                                                                                                                                                                                                                                                                                                                |

Abbreviations: CCRS: Continuing Care Reporting System; DAD: Discharge Abstract Database; ICU: Intensive Care Unit; LTC: long term care; ODB: Ontario Drug Benefit; OHIP: Ontario Health Insurance Plan; HCC: Home and community care; MRR: minimum reporting requirements.

\*If an LTC resident was transferred to the hospital (with or without ICU admission) on or within 14 days after their index date, the patient will be categorized under “hospitalized with/ with no ICU”, accordingly.

Note that highest level of care was for care for COVID-19 and was determined for the people with COVID-19 only. Level of care is distinct from residence at index date as defined in Appendix 1c. Figure S2 shows the residence at index date and transitions to level of care group.

## **Appendix 2b) Matching strategy for people with COVID-19 and controls in British Columbia and Ontario**

Potential controls (the general population in BC and Ontario, registered for MSP and OHIP respectively) who did not have a positive test for SARS-CoV-2 up to June 30, 2020 in the BC Ministry of Health COVID-19 Test Lab Data<sup>1,2</sup> or the Ontario Laboratory Information System (OLIS) COVID-19 database<sup>3</sup>, were randomly assigned pseudo-index dates based on the distribution of index dates. People with COVID-19 and controls were hard-matched on sex, place of residence at index date (Appendix 1c), age on index date (+/- 5 years), calendar week of index/pseudo-index date (+/-1 week), and on the logit of the propensity score within a caliper width of 0.1 standard deviation. Propensity scores for a positive SARS-CoV-2 test were computed from multimorbidity using John's Hopkins' Adjusted Clinical Groups® System (ACG®) version 10 Aggregated Diagnosis Groups (ADGs) (Appendix 1d) and Resource Utilization Band<sup>4</sup> and geographic and socioeconomic factors (Appendix 1e). The quality of the matching was evaluated using weighted standardized differences<sup>5</sup>.

## Appendix 2c) Determination of Place of Residence at index date for people with COVID-19 and controls in British Columbia and Ontario

| Residence            | BC Data | Ontario Data        | Variable(s) and values                                                                                                                                                                                                                                                                                                                                                                                                                                                                                                                                          |
|----------------------|---------|---------------------|-----------------------------------------------------------------------------------------------------------------------------------------------------------------------------------------------------------------------------------------------------------------------------------------------------------------------------------------------------------------------------------------------------------------------------------------------------------------------------------------------------------------------------------------------------------------|
| Long-term care (LTC) | HCC-MRR | CCRS<br>ODB<br>OHIP | At least one of the following:<br>CCRS: Admission date prior to the index date, and discharge date after the index date or no discharge date (person is still residing in LTC);<br>ODB: LTC flag on prescription in ODB within 90 days before the index date;<br>Claim for a physician service dated within 90 days before index date with fee code indicating service was provided in a LTC residence and the institution code in the claim designating a LTC residence.<br><br>HCC-MRR: Resident of facility care with no service end date before index date. |
| Home (community)     |         |                     | Does not meet criteria for long-term care                                                                                                                                                                                                                                                                                                                                                                                                                                                                                                                       |

Abbreviations: BC: British Columbia; CCRS: Continuing Care Reporting System; LTC: long term care; ODB: Ontario Drug Benefit; OHIP: Ontario Health Insurance Plan; HCC-MRR: Home and Community Care Minimum Reporting Requirements.

## Appendix 2d) Comorbidity

The John's Hopkins' Adjusted Clinical Groups® System (ACG®) software uses the diagnosis codes found in inpatient and same day surgery hospital discharge records, emergency department visit records and physician claims to assign 32 Aggregated Diagnosis Group (ADG) binary variables to each individual. ADGs are determined by five clinical dimensions: 1) duration of the condition, 2) severity of the condition, 3) diagnostic certainty, 4) etiology of the condition, and 5) specialty care involvement<sup>4</sup>.

In BC, we used diagnosis codes found in records from the Canadian Institute for Health Information - Discharge Abstract Database (CIHI-DAD) and MSP Payment Information Files, in the year before index date for people with COVID-19 and the year before pseudo-index date for potential controls, to assign the ADGs. In Ontario, we used diagnosis codes found in records from the Canadian Institute for Health Information - Discharge Abstract Database (CIHI-DAD), CIHI - National Ambulatory Care Reporting System database (CIHI-NACRS), and Ontario Health Insurance Plan (OHIP) Physicians' Claims database in the year before index date for people with COVID-19 and the year before pseudo-index date for potential controls, to assign the ADGs. In both provinces, we used the 32 ADGs in the propensity score to match controls to people with COVID-19.

We also used the point-scoring system developed by Austin and van Walraven<sup>6</sup> to calculate an ADG comorbidity score for each patient and control.

## Appendix 2e) Variables describing residence and socioeconomic factors in British Columbia and Ontario

| Variable                                                           | British Columbia                                                                                                                                                                                                                                                                                                                   | Ontario                                               |
|--------------------------------------------------------------------|------------------------------------------------------------------------------------------------------------------------------------------------------------------------------------------------------------------------------------------------------------------------------------------------------------------------------------|-------------------------------------------------------|
| Rurality of residence<br>Statistics Canada definition <sup>7</sup> | Dissemination blocks with a population of $\geq 1000$ and $\geq 400$ persons per square kilometre, and adjacent areas with a population of $\geq 1000$ and $\geq 400$ employees per square kilometre, such that the cluster of areas has $\geq 400$ persons per square kilometre, are designated urban. All other areas are rural. |                                                       |
| Postal code rural indicator <sup>8</sup>                           | The second character of Canada's six-digit postal codes is a number. A zero indicates a wide-area rural region.                                                                                                                                                                                                                    |                                                       |
| Rurality Index of Ontario (RIO) <sup>9</sup>                       | N/A                                                                                                                                                                                                                                                                                                                                | <40 = not rural area;<br>$\geq 40$ = rural area       |
| Health authority                                                   | Health Authority                                                                                                                                                                                                                                                                                                                   | Local Health Integration Network (LHIN) <sup>10</sup> |
| Neighbourhood income quintile                                      | Neighbourhood income quintile, based on the 2016 Canadian census                                                                                                                                                                                                                                                                   |                                                       |

## Appendix 2f) Resources and costing methods in British Columbia and Ontario

| Resource Category                                                                                    | Database                               |                                        | Costing methods                                                                                                                                                                                                                                                                                                                                                                                                                                                                                                                                                             |
|------------------------------------------------------------------------------------------------------|----------------------------------------|----------------------------------------|-----------------------------------------------------------------------------------------------------------------------------------------------------------------------------------------------------------------------------------------------------------------------------------------------------------------------------------------------------------------------------------------------------------------------------------------------------------------------------------------------------------------------------------------------------------------------------|
|                                                                                                      | British Columbia                       | Ontario                                |                                                                                                                                                                                                                                                                                                                                                                                                                                                                                                                                                                             |
| Cancer clinic, dialysis clinic                                                                       | N/A                                    | CIHI-NACRS                             | RIW $\times$ CPWC 2018 $\times$ inflation using the CPI for health care. The CPWC was extrapolated to 2020 using data from 2002 to 2018.                                                                                                                                                                                                                                                                                                                                                                                                                                    |
| Outpatient clinic visits                                                                             | N/A                                    | CIHI-NACRS                             | Cost per visit in 2018 adjusted for inflation using the CPI for health care.                                                                                                                                                                                                                                                                                                                                                                                                                                                                                                |
| Physician services (general/family practice and specialties) and OHIP-covered non-physician services | MSP Payment Information File           | OHIP Claims Database                   | Ontario: Costs for 2018 were adjusted for inflation using the CPI for health care services.<br>BC: Paid amounts were used as they appeared in the data, using the current Payment Schedule at the time of the claim (including temporary COVID-19-related changes)                                                                                                                                                                                                                                                                                                          |
| Emergency department visits                                                                          | CIHI-NACRS emergency department visits | CIHI-NACRS emergency department visits | Ontario: RIW $\times$ CPWC $\times$ inflation using the CPI for health care. The CPWC was extrapolated to 2020 using data from 2002 to 2018.<br>ED visits in March 2020 with a main diagnosis of COVID (U07) were not assigned an RIW. An estimated value was assigned using the relationship between triage level and RIW observed for other ED visits (R-square = 0.30).<br><br>BC: RIW was not available in the BC data; a mean cost per ED visit (adjusted for inflation using the CPI for health care services) was applied to records in the NACRS data <sup>11</sup> |
| Inpatient hospitalization and same day surgery                                                       | CIHI-DAD and SDS                       | CIHI-DAD and SDS                       | Both provinces: RIW $\times$ CSHS $\times$ inflation using the CPI for health care. The CSHS was extrapolated to 2020 using data from 2002 to 2018 (Ontario) and 2014 to 2018 (BC).<br><br>Ontario inpatient hospitalization: Hospital discharges in March 2020 with a most responsible diagnosis of COVID (U07*) were not assigned an RIW. An estimated value was assigned using the relationship between length of stay and RIW observed for other hospital stays (R-square = 0.47).                                                                                      |

Appendix 2, as supplied by the authors. Appendix to: Tsui TCO, Zeitouny S, Bremner KE, et al. Initial health care costs for COVID-19 in British Columbia and Ontario, Canada: an interprovincial population-based cohort study. *CMAJ Open* 2022. doi:10.9778/cmajo.20210328. Copyright © 2022 The Author(s) or their employer(s). To receive this resource in an accessible format, please contact us at [cmajgroup@cmaj.ca](mailto:cmajgroup@cmaj.ca).

|                                                                   |                                                         |                                            |                                                                                                                                                                                                                                                                                                                                                                                                                                         |
|-------------------------------------------------------------------|---------------------------------------------------------|--------------------------------------------|-----------------------------------------------------------------------------------------------------------------------------------------------------------------------------------------------------------------------------------------------------------------------------------------------------------------------------------------------------------------------------------------------------------------------------------------|
|                                                                   |                                                         |                                            | Ontario SDS: $RIW \times CPWC \times \text{inflation using the CPI for health care. The CPWC was extrapolated to 2020 using data from 2002 to 2018.}$                                                                                                                                                                                                                                                                                   |
| Mental health inpatient care                                      | N/A                                                     | Ontario Mental Health Reporting System     | Weighted days $\times$ cost per weighted day $\times$ inflation using the CPI for health care. Weighted days were estimated using the relationship between actual days and weighted days observed for 2018 data (R-square = 0.98). Cost per weighted day was extrapolated to 2020 from earlier costs.                                                                                                                                   |
| Outpatient prescription drugs                                     | PharmaNet                                               | Ontario Drug Benefit Program database      | Ontario: Total paid $\times$ inflation using the CPI for medicinal and pharmaceutical products.<br>BC: Total costs (ingredient cost plus fees) paid by both PharmaCare and private payment.                                                                                                                                                                                                                                             |
| Cancer chemotherapy drugs covered by the New Drug Funding Program | N/A                                                     | New Drug Funding Program data<br>N/A in BC | Drug cost $\times$ inflation using the CPI for medicinal and pharmaceutical products.                                                                                                                                                                                                                                                                                                                                                   |
| Laboratory tests                                                  | MSP Payment Information File                            | OHIP laboratory tests                      | Ontario: Average costs for 2018 were adjusted for inflation using the CPI for health care services.<br>BC: Paid amounts were used as they appeared in the data, using the current Payment Schedule at the time of the claim (including temporary COVID-19-related changes).                                                                                                                                                             |
| Home Care                                                         | Home and community care-Minimum Reporting Requirements. | Home Care Database                         | Ontario: Cost for a given service $\times$ inflation. The most recent available costs are for 2018. These were used, adjusted for inflation using the CPI for health care services.<br>BC: Costs were calculated at an average hourly rate for home support services and an average cost per visit for home nursing and other health professional services, using published values adjusted for inflation using the CPI for health care |



|                         |                                                          |           |                                                                                                                                                                                                                                                                                                                                                                                                                                                                                                                                                                                                                                                                                                                                |
|-------------------------|----------------------------------------------------------|-----------|--------------------------------------------------------------------------------------------------------------------------------------------------------------------------------------------------------------------------------------------------------------------------------------------------------------------------------------------------------------------------------------------------------------------------------------------------------------------------------------------------------------------------------------------------------------------------------------------------------------------------------------------------------------------------------------------------------------------------------|
|                         |                                                          |           | services <sup>12</sup> . Costs were distributed uniformly across the service period (from service start date to the service end date or end of observation period).                                                                                                                                                                                                                                                                                                                                                                                                                                                                                                                                                            |
| Long-term care          | Home and community care- Minimum Reporting Requirements. | CCRS data | <p>Ontario: Weighted days × cost per weighted day × inflation using the CPI for health care.</p> <p>Days in LTC were obtained from the CCRS data, assuming that a missing discharge date means that the person is still in LTC. The relationship between weighted days and actual days was estimated using the observed relationship for 2019 (R-square = 0.89).</p> <p>The cost per weighted day was extrapolated to 2020 using data from earlier years.</p> <p>BC: Costs were calculated at an average daily rate<sup>12</sup>, adjusted for inflation using the CPI for health care services, applied to each day of the service period (from service start date to the service end date or end of observation period).</p> |
| Complex continuing care | N/A                                                      | CCRS data | <p>Weighted days × cost per weighted day × inflation using the CPI for health care.</p> <p>Days in CCC were obtained from the CCRS data, assuming that a missing discharge date means that the person is still in the CCC facility. The relationship between weighted days and actual days was estimated using the observed relationship for 2018 (R-square = 0.90). The cost per weighted day was extrapolated from data from earlier years.</p>                                                                                                                                                                                                                                                                              |

BC: British Columbia; CCC: Complex Continuing Care; CCRS: Continuing Care Reporting System; CIHI: Canadian Institute for Health Information; CPI: Consumer Price Index; CPWC: cost per weighted case; DAD: Discharge Abstract Database; ED: emergency department; LTC: long-term care; MSP: Medical Services Plan; NACRS: National Ambulatory Care Reporting System; OHIP: Ontario Health Insurance Plan; RIW: Resource Intensity Weight; SDS: same day surgery.

**Figure S1.** Cohort selection process

a) in British Columbia

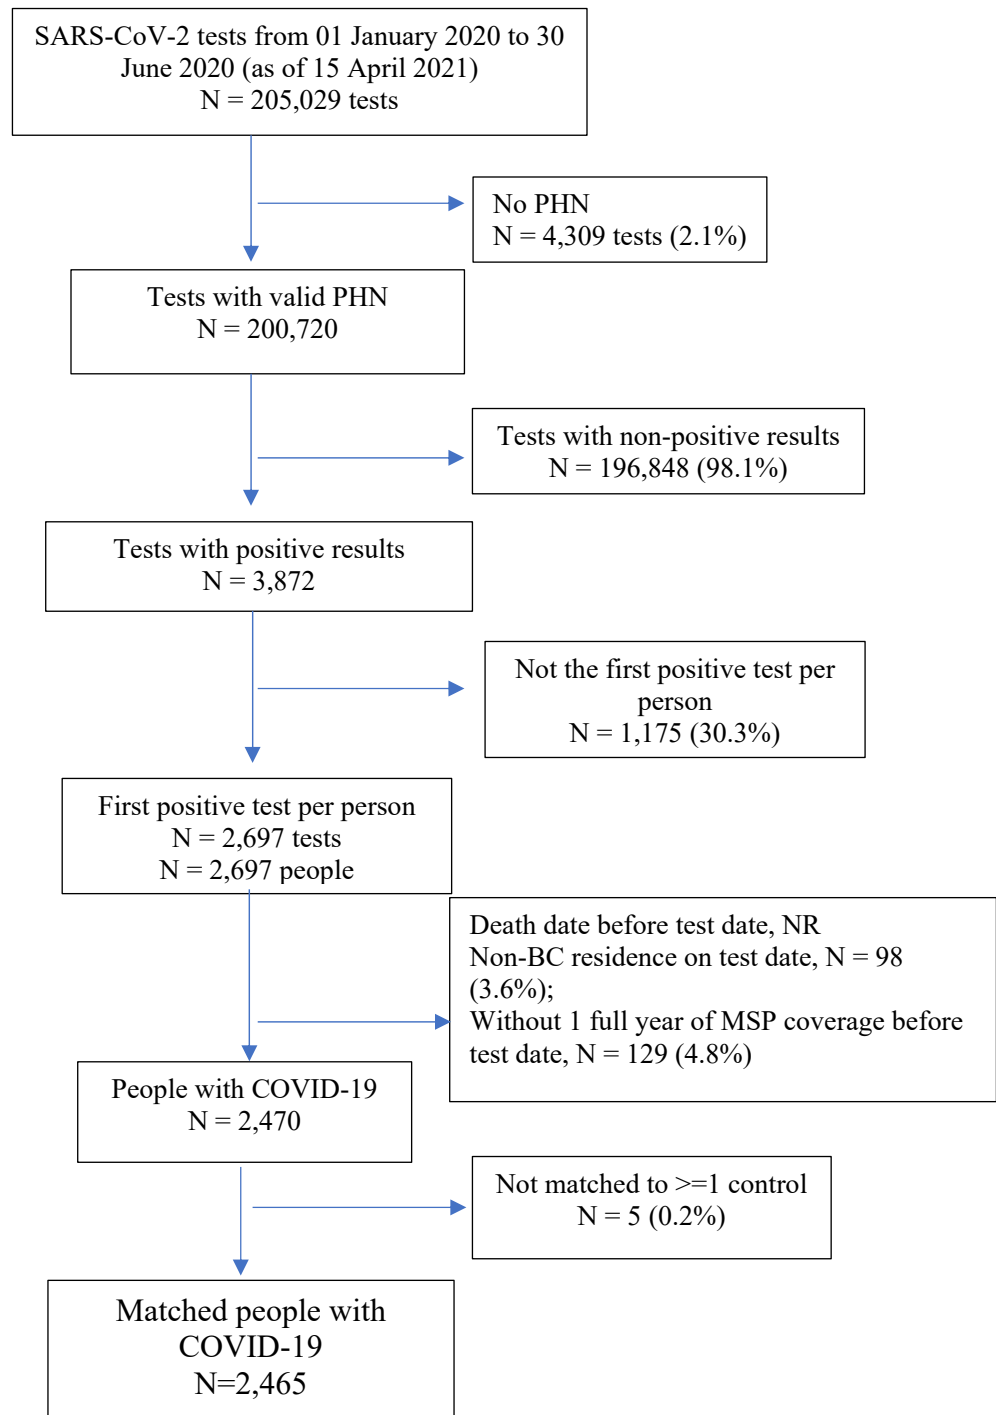

Abbreviations: BC: British Columbia; MSP: Medical Services Plan; NR: not reported ( $\leq 5$  people); PHN: Personal Health Number

b) in Ontario

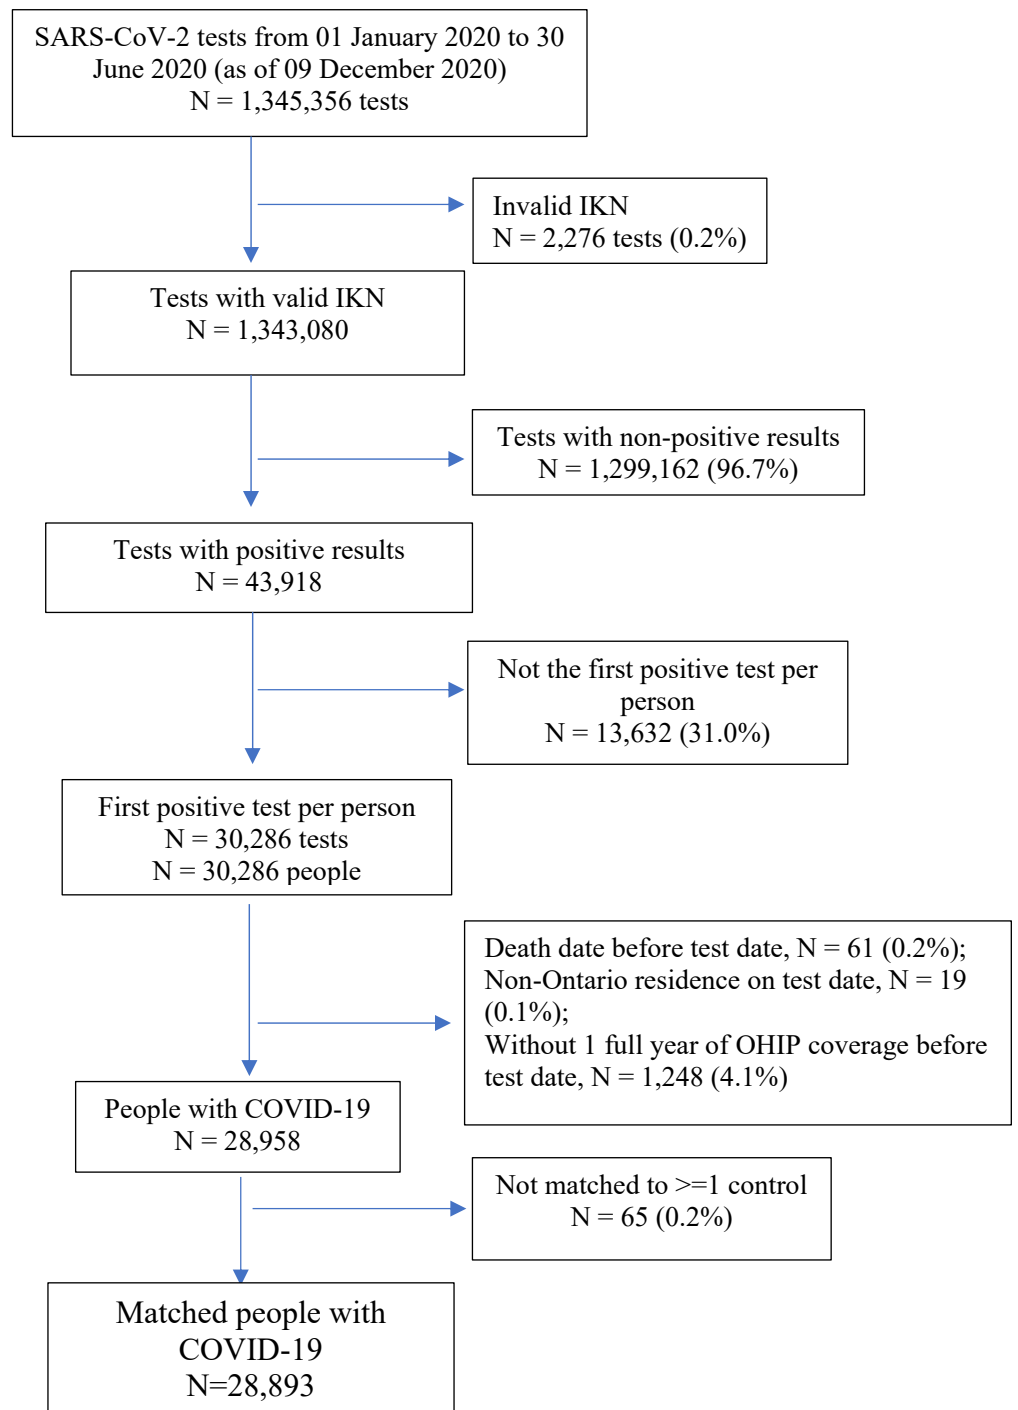

Abbreviations: IKN: ICES Key number (anonymous identifier used to link databases); OHIP: Ontario Health Insurance Plan

**Figure S2.** Transitions from place of residence at index date to level of care for people with COVID-19

a) British Columbia

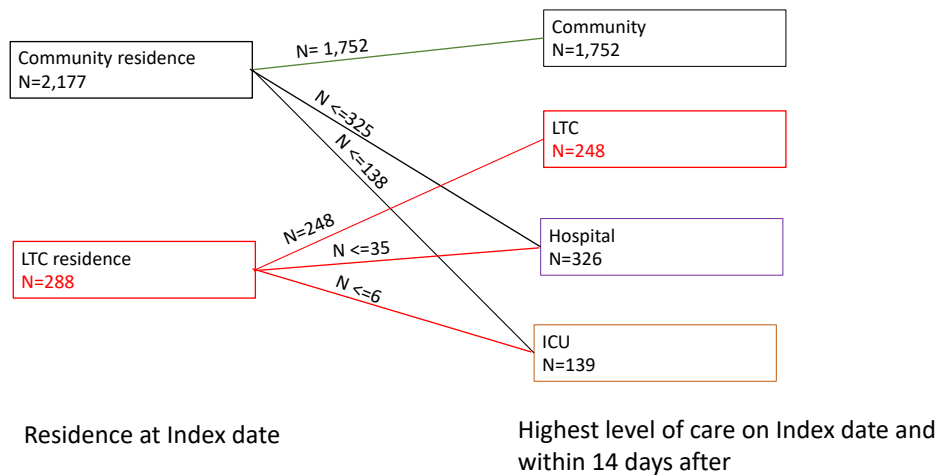

b) Ontario

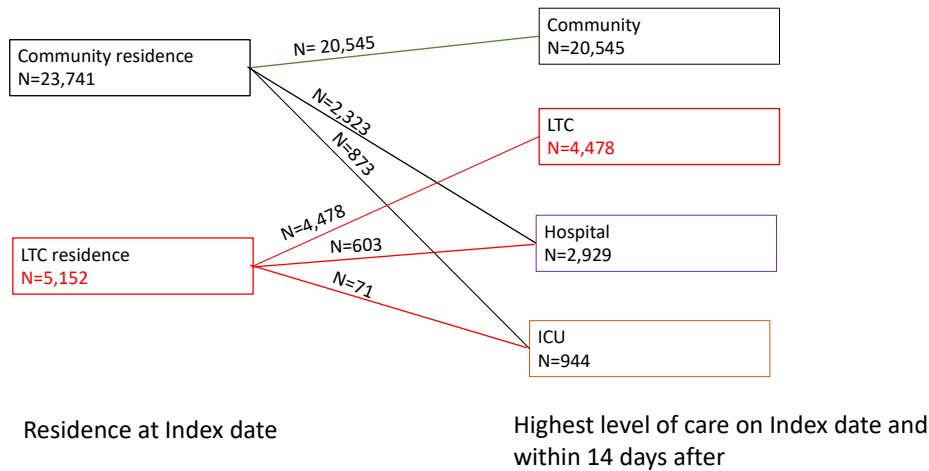

Note that highest level of care was for care for COVID-19 and was determined for people with COVID-19 only.

**Figure S3.** Kaplan-Meier survival curves for a) British Columbia, and b) Ontario

a) British Columbia

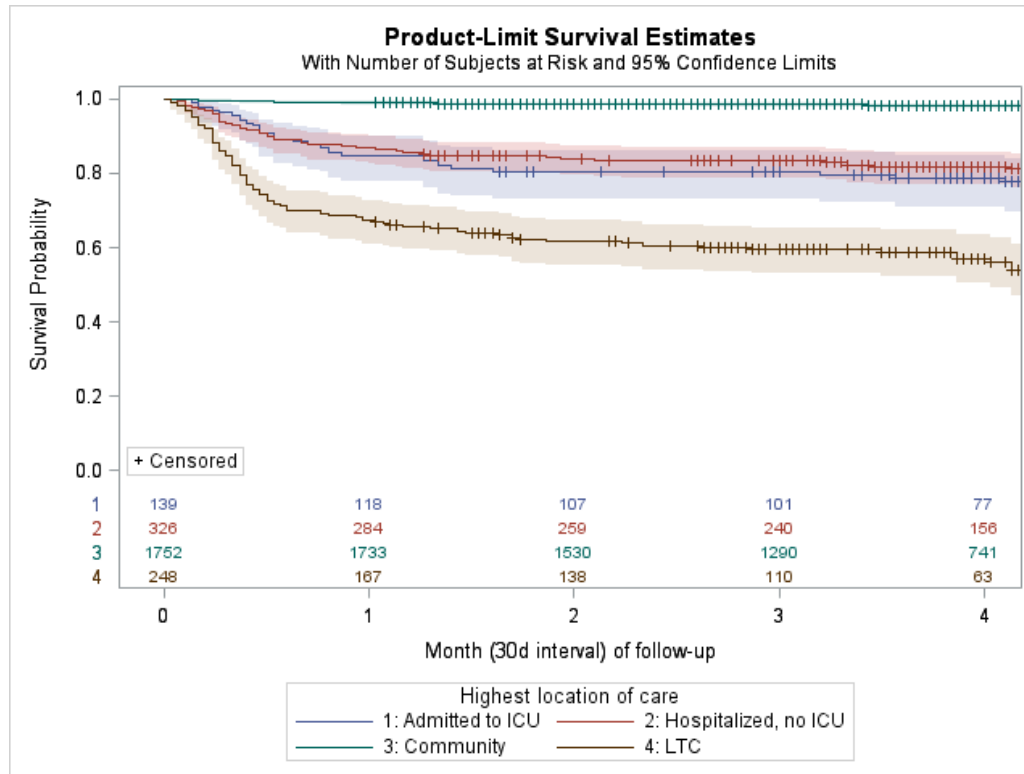

b) Ontario

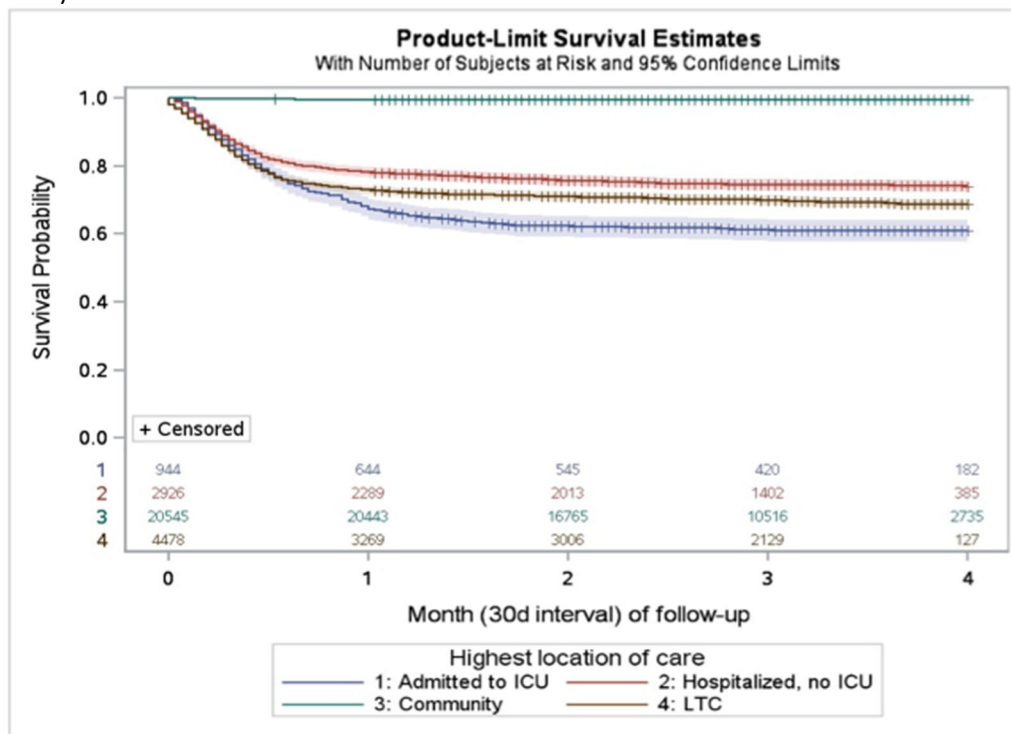

**Table S1.** British Columbia - Characteristics of people with COVID-19 and matched controls for each level of care

a) Community

| Variable                                         | Value             | Controls    | People with COVID-19 |
|--------------------------------------------------|-------------------|-------------|----------------------|
| <b>Age at index date</b>                         |                   |             |                      |
|                                                  | Mean $\pm$ SD     | 45(18)      | 45(18)               |
|                                                  | Median (IQR)      | 45(33-57)   | 45(33-57)            |
| <b>Sex N (%)</b>                                 |                   |             |                      |
|                                                  | Female            | 4,028 (57%) | 1,007 (57%)          |
|                                                  | Male              | 2,980 (43%) | 745 (43%)            |
| <b>Rural/Small Town N (%)</b>                    |                   |             |                      |
|                                                  | Not rural         | 6,649 (95%) | 1,668 (95%)          |
|                                                  | Rural             | 359 (5%)    | 84 (5%)              |
| <b>Rurality of residence (postal code) N (%)</b> |                   |             |                      |
|                                                  | Not rural         | 6,685 (95%) | 1,679 (96%)          |
|                                                  | Rural             | 323 (5%)    | 73 (4%)              |
| <b>Health Authority N (%)</b>                    |                   |             |                      |
|                                                  | Interior          | 500 (7%)    | 122 (7%)             |
|                                                  | Fraser            | 3,536 (50%) | 966 (55%)            |
|                                                  | Vancouver Coastal | 2,347 (33%) | 524 (30%)            |
|                                                  | Vancouver Island  | 441 (6%)    | 98 (6%)              |
|                                                  | Northern          | 184 (3%)    | 42 (2%)              |
| <b>Neighbourhood income quintile N (%)</b>       |                   |             |                      |
|                                                  | 1-lowest          | 1,645 (23%) | 370 (21%)            |
|                                                  | 2                 | 1,428 (20%) | 384 (22%)            |
|                                                  | 3                 | 1,478 (21%) | 355 (20%)            |
|                                                  | 4                 | 1,316 (19%) | 328 (19%)            |
|                                                  | 5-highest         | 1,052 (15%) | 291 (17%)            |
|                                                  | Missing           | 89 (1%)     | 24 (1%)              |
| <b>RUB N (%)</b>                                 |                   |             |                      |
|                                                  | 0                 | 554 (8%)    | 126 (7%)             |
|                                                  | 1                 | 419 (6%)    | 103 (6%)             |
|                                                  | 2                 | 1,127 (16%) | 330 (19%)            |
|                                                  | 3                 | 3,800 (54%) | 962 (55%)            |
|                                                  | 4                 | 768 (11%)   | 166 (9%)             |
|                                                  | 5                 | 340 (5%)    | 65 (4%)              |

Appendix 2, as supplied by the authors. Appendix to: Tsui TCO, Zeitouny S, Bremner KE, et al. Initial health care costs for COVID-19 in British Columbia and Ontario, Canada: an interprovincial population-based cohort study. *CMAJ Open* 2022. doi:10.9778/cmajo.20210328. Copyright © 2022 The Author(s) or their employer(s). To receive this resource in an accessible format, please contact us at cmajgroup@cmaj.ca.

|                                                                 |               |             |             |
|-----------------------------------------------------------------|---------------|-------------|-------------|
| <b>ADG score</b>                                                |               |             |             |
|                                                                 | Mean $\pm$ SD | 7(11)       | 6(10)       |
|                                                                 | Median (IQR)  | 4(0-13)     | 4(0-11)     |
| <b>Number of days of follow-up after Index date<sup>1</sup></b> |               |             |             |
|                                                                 | Mean $\pm$ SD | 104(32)     | 104(32)     |
|                                                                 | Median (IQR)  | 110(87-130) | 111(88-130) |

<sup>1</sup>Controls were censored on the date that their matched person with COVID-19 died or was censored

Abbreviations: ADG: Adjusted Diagnostic Group; IQR: Interquartile range; SD: standard deviation; RUB: Resource utilization band

b) Long-term care

| Variable                      | Value             | Controls  | People with COVID-19 |
|-------------------------------|-------------------|-----------|----------------------|
| <b>Age at index date</b>      |                   |           |                      |
|                               | Mean $\pm$ SD     | 85(9)     | 85(9)                |
|                               | Median (IQR)      | 87(80-92) | 87(80-92)            |
| <b>Sex N (%)</b>              |                   |           |                      |
|                               | Female            | 672 (68%) | 168 (68%)            |
|                               | Male              | 320 (32%) | 80 (32%)             |
| <b>Rural/Small Town N (%)</b> |                   |           |                      |
|                               | Not rural         | 964 (97%) | 248 (100%)           |
|                               | Rural             | 28 (3%)   | NR                   |
|                               | Not rural         | 963 (97%) | 246 (99%)            |
|                               | Rural             | 29 (3%)   | NR                   |
| <b>Health Authority N (%)</b> |                   |           |                      |
|                               | Interior          | 66 (7%)   | NR                   |
|                               | Fraser            | 522 (53%) | 85 (34%)             |
|                               | Vancouver Coastal | 348 (35%) | 162 (65%)            |
|                               | Vancouver Island  | 49 (5%)   | NR                   |
|                               | Northern          | 7 (1%)    | NR                   |
|                               | 1-lowest          | 335 (34%) | 111 (45%)            |
|                               | 2                 | 202 (20%) | 39 (16%)             |
|                               | 3                 | 183 (18%) | 60 (24%)             |
|                               | 4                 | 152 (15%) | 23 (9%)              |
|                               | 5-highest         | 113 (11%) | 15 (6%)              |
|                               | Missing           | 6 (1%)    | NR                   |
| <b>RUB N (%)</b>              |                   |           |                      |
|                               | 0                 | NR        | NR                   |

|                                                                 |               |            |            |
|-----------------------------------------------------------------|---------------|------------|------------|
|                                                                 | 1             | NR         | NR         |
|                                                                 | 2             | NR         | NR         |
|                                                                 | 3             | 254 (26%)  | 88 (35%)   |
|                                                                 | 4             | 299 (30%)  | 82 (33%)   |
|                                                                 | 5             | 435 (44%)  | 76 (31%)   |
| <b>ADG score</b>                                                |               |            |            |
|                                                                 | Mean $\pm$ SD | 31(12)     | 27(12)     |
|                                                                 | Median (IQR)  | 31(22-39)  | 26(18-35)  |
| <b>Number of days of follow-up after Index date<sup>1</sup></b> |               |            |            |
|                                                                 | Mean $\pm$ SD | 67(49)     | 70(50)     |
|                                                                 | Median (IQR)  | 74(13-118) | 79(14-120) |

<sup>1</sup>Controls were censored on the date that their matched person with COVID-19 died or was censored

Abbreviations: ADG: Adjusted Diagnostic Group; IQR: Interquartile range; SD: standard deviation; RUB: Resource utilization band

c) Hospital

| Variable                      | Value             | Controls     | People with COVID-19 |
|-------------------------------|-------------------|--------------|----------------------|
| <b>Age at index date</b>      |                   |              |                      |
|                               | Mean $\pm$ SD     | 68 (18)      | 68 (18)              |
|                               | Median (IQR)      | 71 (55-82)   | 71 (55-82)           |
| <b>Sex N (%)</b>              |                   |              |                      |
|                               | Female            | 568 (44%)    | 142 (44%)            |
|                               | Male              | 736 (56%)    | 184 (56%)            |
| <b>Rural/Small Town N (%)</b> |                   |              |                      |
|                               | Not rural         | 1253 (96%)   | 316 (97%)            |
|                               | Rural             | 51 (4%)      | 10 (3%)              |
| <b>Health Authority N (%)</b> |                   |              |                      |
|                               | Interior          | 86 (7%)      | 19 (6%)              |
|                               | Fraser            | 694.33 (53%) | 193 (59%)            |
|                               | Vancouver Coastal | 448.67 (34%) | 92 (28%)             |
|                               | Vancouver Island  | 57 (4%)      | 16 (5%)              |
|                               | Northern          | 18 (1%)      | 6 (2%)               |
| <b>Income Quintile N(%)</b>   |                   |              |                      |
|                               | 1-lowest          | 342 (26%)    | 89 (27%)             |
|                               | 2                 | 269 (21%)    | 53 (16%)             |



|                                                     |               |              |              |
|-----------------------------------------------------|---------------|--------------|--------------|
|                                                     | 3             | 268 (21%)    | 72 (22%)     |
|                                                     | 4             | 213 (16%)    | 64 (20%)     |
|                                                     | 5-highest     | 203 (16%)    | 46 (14%)     |
| <b>RUB N (%)</b>                                    |               |              |              |
|                                                     | 0             | 31 (2%)      | NR           |
|                                                     | 1             | 27 (2%)      | 7 (2%)       |
|                                                     | 2             | 88 (7%)      | 13 (4%)      |
|                                                     | 3             | 621 (48%)    | 156 (48%)    |
|                                                     | 4             | 239 (18%)    | 63 (19%)     |
|                                                     | 5             | 298 (23%)    | 82 (25%)     |
| <b>ADG score</b>                                    |               |              |              |
|                                                     | Mean $\pm$ SD | 18 (15)      | 18 (14)      |
|                                                     | Median (IQR)  | 17 (6-28)    | 17 (7-27)    |
| <b>Number of days of follow-up after Index date</b> |               |              |              |
|                                                     | Mean $\pm$ SD | 98 (43)      | 99 (42)      |
|                                                     | Median (IQR)  | 118 (79-127) | 119 (81-127) |

<sup>1</sup>Controls were censored on the date that their matched person with COVID-19 died or was censored

Abbreviations: ADG: Adjusted Diagnostic Group; IQR: Interquartile range; SD: standard deviation; RUB: Resource utilization band

d) Intensive Care Unit

| <b>Variable</b>                                  | <b>Value</b>  | <b>Controls</b> | <b>People with COVID-19</b> |
|--------------------------------------------------|---------------|-----------------|-----------------------------|
| <b>Age at index date</b>                         |               |                 |                             |
|                                                  | Mean $\pm$ SD | 65(14)          | 65(14)                      |
|                                                  | Median (IQR)  | 68(58-74)       | 68(58-74)                   |
| <b>Sex N (%)</b>                                 |               |                 |                             |
|                                                  | Female        | 220 (40%)       | 55 (40%)                    |
|                                                  | Male          | 336 (60%)       | 84 (60%)                    |
| <b>Rural/Small Town N (%)</b>                    |               |                 |                             |
|                                                  | Not rural     | 510 (94%)       | 130 (94%)                   |
|                                                  | Rural         | 46 (6%)         | 9 (6%)                      |
| <b>Rurality of residence (postal code) N (%)</b> |               |                 |                             |
|                                                  | Not rural     | 518 (95%)       | 132 (95%)                   |

|                                                                 |                   |             |             |
|-----------------------------------------------------------------|-------------------|-------------|-------------|
|                                                                 | Rural             | 38 (5%)     | 7 (5%)      |
| <b>Health Authority N (%)</b>                                   |                   |             |             |
|                                                                 | Interior          | 57 (8%)     | 11 (8%)     |
|                                                                 | Fraser            | 248 (32%)   | 44 (32%)    |
|                                                                 | Vancouver Coastal | 187 (48%)   | 67 (48%)    |
|                                                                 | Vancouver Island  | 46 (6%)     | 9 (6%)      |
|                                                                 | Northern          | 18 (6%)     | 8 (6%)      |
| <b>Neighbourhood income quintile N (%)</b>                      |                   |             |             |
|                                                                 | 1-lowest          | 119 (22%)   | 31 (22%)    |
|                                                                 | 2                 | 106 (19%)   | 27 (19%)    |
|                                                                 | 3                 | 119 (20%)   | 28 (20%)    |
|                                                                 | 4                 | 92 (14%)    | 19 (14%)    |
|                                                                 | 5-highest         | 112 (22%)   | 31 (22%)    |
|                                                                 | 9-missing         | 8 (%)       | NR          |
| <b>RUB N (%)</b>                                                |                   |             |             |
|                                                                 | 0                 | 24 (4%)     | 6 (4%)      |
|                                                                 | 1                 | 16 (%)      | NR          |
|                                                                 | 2                 | 61 (8%)     | 11 (8%)     |
|                                                                 | 3                 | 274 (56%)   | 78 (56%)    |
|                                                                 | 4                 | 101 (14%)   | 19 (14%)    |
|                                                                 | 5                 | 80 (15%)    | 21 (15%)    |
| <b>ADG score</b>                                                |                   |             |             |
|                                                                 | Mean $\pm$ SD     | 14(13)      | 13(12)      |
|                                                                 | Median (IQR)      | 12(4-22)    | 11(4-18)    |
| <b>Number of days of follow-up after Index date<sup>1</sup></b> |                   |             |             |
|                                                                 | Mean $\pm$ SD     | 100(44)     | 100(44)     |
|                                                                 | Median (IQR)      | 122(73-130) | 122(73-130) |

<sup>1</sup>Controls were censored on the date that their matched person with COVID-19 died or was censored

Abbreviations: ADG: Adjusted Diagnostic Group; IQR: Interquartile range; SD: standard deviation; RUB: Resource utilization band

**Table S1.** Ontario - Characteristics of people with COVID-19 and matched controls for each level of care

a) Community

| Variable                                         | Value                               | Controls<br>N=82,148 | People with<br>COVID-19<br>N=20,545 |
|--------------------------------------------------|-------------------------------------|----------------------|-------------------------------------|
| <b>Age at index date</b>                         |                                     |                      |                                     |
|                                                  | Mean $\pm$ SD                       | 44.49 $\pm$ 18.13    | 44.49 $\pm$ 18.13                   |
|                                                  | Median (IQR)                        | 45 (30-57)           | 45 (30-57)                          |
|                                                  | Female                              | 45,805 (55.8%)       | 11,457 (55.8%)                      |
|                                                  | Male                                | 36,343 (44.2%)       | 9,088 (44.2%)                       |
| <b>Neighbourhood income quintile N (%)</b>       |                                     |                      |                                     |
|                                                  | 1-lowest                            | 21,744 (26.5%)       | 5,736 (27.9%)                       |
|                                                  | 2                                   | 18,197 (22.2%)       | 4,382 (21.3%)                       |
|                                                  | 3                                   | 16,632 (20.2%)       | 4,225 (20.6%)                       |
|                                                  | 4                                   | 13,396 (16.3%)       | 3,366 (16.4%)                       |
|                                                  | 5-highest                           | 12,176 (14.8%)       | 2,836 (13.8%)                       |
| <b>Rural/Small Town N (%)</b>                    |                                     |                      |                                     |
|                                                  | Not rural                           | 78,710 (95.8%)       | 19,814 (96.4%)                      |
|                                                  | Rural                               | 3,438 (4.2%)         | 731 (3.6%)                          |
| <b>Rurality of residence (postal code) N (%)</b> |                                     |                      |                                     |
|                                                  | Not rural                           | 76,573 (93.2%)       | 19,342 (94.1%)                      |
|                                                  | Rural                               | 5,575 (6.8%)         | 1,203 (5.9%)                        |
| <b>Local Health Integration Network N (%)</b>    |                                     |                      |                                     |
|                                                  | Erie St. Clair                      | 3,495 (4.3%)         | 971 (4.7%)                          |
|                                                  | South West                          | 2,692 (3.3%)         | 582 (2.8%)                          |
|                                                  | Waterloo Wellington                 | 3,564 (4.3%)         | 879 (4.3%)                          |
|                                                  | Hamilton Niagara<br>Haldimand Brant | 5,585 (6.8%)         | 1,363 (6.6%)                        |
|                                                  | Central West                        | 11,341 (13.8%)       | 3,525 (17.2%)                       |
|                                                  | Mississauga Halton                  | 8,437 (10.3%)        | 2,030 (9.9%)                        |
|                                                  | Toronto Central                     | 9,259 (11.3%)        | 2,165 (10.5%)                       |
|                                                  | Central West                        | 16,547 (20.1%)       | 4,195 (20.4%)                       |
|                                                  | Central East                        | 11,356 (13.8%)       | 2,710 (13.2%)                       |
|                                                  | South East                          | 1,198 (1.5%)         | 248 (1.2%)                          |
|                                                  | Champlain                           | 5,992 (7.3%)         | 1,335 (6.5%)                        |
|                                                  | North Simcoe Muskoka                | 1,227 (1.5%)         | 278 (1.4%)                          |
|                                                  | North East                          | 954 (1.2%)           | 158 (0.8%)                          |
|                                                  | North West                          | 493 (0.6%)           | 106 (0.5%)                          |

|                                                                 |               |                   |                   |
|-----------------------------------------------------------------|---------------|-------------------|-------------------|
|                                                                 | missing       | 8 (0.0%)          | 0 (0.0%)          |
| <b>Residence at time of testing N (%)</b>                       |               |                   |                   |
|                                                                 | Community     | 82,148 (100%)     | 20,545 (100%)     |
| <b>ADG score</b>                                                |               |                   |                   |
|                                                                 | Mean $\pm$ SD | 7.53 $\pm$ 10.91  | 6.68 $\pm$ 10.05  |
|                                                                 | Median (IQR)  | 4 (0-12)          | 4 (0-10)          |
| <b>RUB</b>                                                      | 0             | 10,501 (12.8%)    | 2,173 (10.6%)     |
|                                                                 | 1             | 4,327 (5.3%)      | 1,391 (6.8%)      |
|                                                                 | 2             | 16,500 (20.1%)    | 4,624 (22.5%)     |
|                                                                 | 3             | 38,854 (47.3%)    | 9,955 (48.5%)     |
|                                                                 | 4             | 8,660 (10.5%)     | 1,740 (8.5%)      |
|                                                                 | 5             | 3,306 (4.0%)      | 662 (3.2%)        |
| <b>Number of days of follow-up after Index date<sup>1</sup></b> |               |                   |                   |
|                                                                 | Mean $\pm$ SD | 87.43 $\pm$ 28.00 | 87.45 $\pm$ 27.98 |
|                                                                 | Median (IQR)  | 91 (66-109)       | 91 (66-109)       |

<sup>1</sup> Controls were censored on the date that their matched person with COVID-19 died or was censored

Abbreviations: ADG: Adjusted Diagnostic Group; IQR: Interquartile range; SD: standard deviation; RUB: Resource utilization band

b) Long-term care

| <b>Variable</b>                            | <b>Value</b>  | <b>Controls<br/>N=17,609</b> | <b>People with<br/>COVID-19<br/>N=4,478</b> |
|--------------------------------------------|---------------|------------------------------|---------------------------------------------|
| <b>Age at index date</b>                   |               |                              |                                             |
|                                            | Mean $\pm$ SD | 83.54 $\pm$ 10.43            | 83.34 $\pm$ 10.80                           |
|                                            | Median (IQR)  | 86 (78-91)                   | 86 (78-91)                                  |
| <b>Sex N (%)</b>                           |               |                              |                                             |
|                                            | Female        | 11,719<br>(66.6%)            | 2,963 (66.2%)                               |
|                                            | Male          | 5,890 (33.4%)                | 1,515 (33.8%)                               |
| <b>Neighbourhood income quintile N (%)</b> |               |                              |                                             |
|                                            | 1-lowest      | 6,023 (34.2%)                | 1,350 (30.1%)                               |
|                                            | 2             | 3,941 (22.4%)                | 1,174 (26.2%)                               |
|                                            | 3             | 2,822 (16.0%)                | 847 (18.9%)                                 |
|                                            | 4             | 2,582 (14.7%)                | 468 (10.5%)                                 |
|                                            | 5-highest     | 2,237 (12.7%)                | 639 (14.3%)                                 |
| <b>Rural/Small Town N (%)</b>              |               |                              |                                             |
|                                            | Not rural     | 16,232<br>(92.2%)            | 4,337 (96.9%)                               |

|                                                                       |                                  |                   |                   |
|-----------------------------------------------------------------------|----------------------------------|-------------------|-------------------|
|                                                                       | Rural                            | 1,377 (7.8%)      | 141 (3.1%)        |
| <b>Rural postal code N (%)</b>                                        |                                  |                   |                   |
|                                                                       | Not rural                        | 16,024 (91.0%)    | 4,115 (91.9%)     |
|                                                                       | Rural                            | 1,585 (9.0%)      | 363 (8.1%)        |
| <b>Local Health Integration Network N (%)</b>                         |                                  |                   |                   |
|                                                                       | Erie St. Clair                   | 1,032 (5.9%)      | 159 (3.6%)        |
|                                                                       | South West                       | 1,033 (5.9%)      | 81 (1.8%)         |
|                                                                       | Waterloo Wellington              | 890 (5.1%)        | 177 (4.0%)        |
|                                                                       | Hamilton Niagara Haldimand Brant | 2,009 (11.4%)     | 155 (3.5%)        |
|                                                                       | Central West                     | 1,121 (6.4%)      | 348 (7.8%)        |
|                                                                       | Mississauga Halton               | 1,165 (6.6%)      | 537 (12.0%)       |
|                                                                       | Toronto Central                  | 1,891 (10.7%)     | 587 (13.1%)       |
|                                                                       | Central West                     | 2,417 (13.7%)     | 958 (21.4%)       |
|                                                                       | Central East                     | 2,623 (14.9%)     | 938 (20.9%)       |
|                                                                       | South East                       | 562 (3.2%)        | 31 (0.7%)         |
|                                                                       | Champlain                        | 1,763 (10.0%)     | 452 (10.1%)       |
|                                                                       | North Simcoe Muskoka             | 475 (2.7%)        | 35 (0.8%)         |
|                                                                       | North East                       | 433 (2.5%)        | <=20              |
|                                                                       | North West                       | 194 (1.1%)        | NR                |
|                                                                       | missing                          | 1 (0.0%)          | 0 (0.0%)          |
| <b>Residence at index date N (%)</b>                                  |                                  |                   |                   |
|                                                                       | Long-term care                   | 17,609 (100%)     | 4,478 (100%)      |
| <b>ADG score</b>                                                      |                                  |                   |                   |
|                                                                       | Mean $\pm$ SD                    | 28.96 $\pm$ 15.11 | 24.44 $\pm$ 15.01 |
|                                                                       | Median (IQR)                     | 26 (16-40)        | 20 (16-34)        |
| <b>RUB N (%)</b>                                                      |                                  |                   |                   |
|                                                                       | 0                                | 76 (0.4%)         | 72 (1.6%)         |
|                                                                       | 1                                | 48 (0.3%)         | 23 (0.5%)         |
|                                                                       | 2                                | 504 (2.9%)        | 300 (6.7%)        |
|                                                                       | 3                                | 8,021 (45.6%)     | 2,318 (51.8%)     |
|                                                                       | 4                                | 3,012 (17.1%)     | 686 (15.3%)       |
|                                                                       | 5                                | 5,948 (33.8%)     | 1,079 (24.1%)     |
| <b>Number of days from index date to end of follow-up<sup>1</sup></b> |                                  |                   |                   |
|                                                                       | Mean $\pm$ SD                    | 70.43 $\pm$ 41.76 | 70.87 $\pm$ 41.78 |
|                                                                       | Median (IQR)                     | 86 (20-107)       | 87 (20-107)       |

<sup>1</sup>Controls were censored on the date that their matched person with COVID-19 died or was censored

Abbreviations: ADG: Adjusted Diagnostic Group; IQR: Interquartile range; NR, not reportable due to small cell size (<5); SD: standard deviation; RUB: Resource utilization band

c) Hospital

| Variable                                      | Value                               | Controls<br>N=11,584 | People with<br>COVID-19<br>N=2,926 |
|-----------------------------------------------|-------------------------------------|----------------------|------------------------------------|
| <b>Age at index date</b>                      |                                     |                      |                                    |
|                                               | Mean $\pm$ SD                       | 69.65 $\pm$ 17.79    | 69.69 $\pm$ 17.78                  |
|                                               | Median (IQR)                        | 73 (58-84)           | 73 (58-84)                         |
| <b>Sex N (%)</b>                              |                                     |                      |                                    |
|                                               | Female                              | 5,768 (49.8%)        | 1,454 (49.7%)                      |
|                                               | Male                                | 5,816 (50.2%)        | 1,472 (50.3%)                      |
| <b>Neighbourhood income quintile N (%)</b>    |                                     |                      |                                    |
|                                               | 1-lowest                            | 3,454 (29.8%)        | 874 (29.9%)                        |
|                                               | 2                                   | 2,694 (23.3%)        | 681 (23.3%)                        |
|                                               | 3                                   | 2,168 (18.7%)        | 574 (19.6%)                        |
|                                               | 4                                   | 1,694 (14.6%)        | 413 (14.1%)                        |
|                                               | 5-highest                           | 1,574 (13.6%)        | 384 (13.1%)                        |
| <b>Rural/Small Town N (%)</b>                 |                                     |                      |                                    |
|                                               | No                                  | 11,088 (95.7%)       | 2,852 (97.5%)                      |
|                                               | Yes                                 | 496 (4.3%)           | 74 (2.5%)                          |
| <b>Rural postal code N (%)</b>                |                                     |                      |                                    |
|                                               | Not rural                           | 10,808 (93.3%)       | 2,799 (95.7%)                      |
|                                               | Rural                               | 776 (6.7%)           | 127 (4.3%)                         |
| <b>Local Health Integration Network N (%)</b> |                                     |                      |                                    |
|                                               | Erie St. Clair                      | 520 (4.5%)           | 124 (4.2%)                         |
|                                               | South West                          | 402 (3.5%)           | 92 (3.1%)                          |
|                                               | Waterloo Wellington                 | 478 (4.1%)           | 109 (3.7%)                         |
|                                               | Hamilton Niagara<br>Haldimand Brant | 869 (7.5%)           | 218 (7.5%)                         |
|                                               | Central West                        | 1,419 (12.2%)        | 350 (12.0%)                        |
|                                               | Mississauga Halton                  | 1,060 (9.2%)         | 324 (11.1%)                        |
|                                               | Toronto Central                     | 1,392 (12.0%)        | 468 (16.0%)                        |
|                                               | Central West                        | 2,229 (19.2%)        | 625 (21.4%)                        |
|                                               | Central East                        | 1,802 (15.6%)        | 353 (12.1%)                        |

|                                                                       |                      |                   |                   |
|-----------------------------------------------------------------------|----------------------|-------------------|-------------------|
|                                                                       | South East           | 170 (1.5%)        | 29 (1.0%)         |
|                                                                       | Champlain            | 852 (7.4%)        | 166 (5.7%)        |
|                                                                       | North Simcoe Muskoka | 176 (1.5%)        | 23 (0.8%)         |
|                                                                       | North East           | 148 (1.3%)        | 29 (1.0%)         |
|                                                                       | North West           | 67 (0.6%)         | 15 (0.5%)         |
|                                                                       | missing              | 0 (0.0%)          | 1 (0.0%)          |
| <b>Residence at index date N (%)</b>                                  |                      |                   |                   |
|                                                                       | Long-term care       | 2,333 (20.1%)     | 603 (20.6%)       |
|                                                                       | Community            | 9,251 (79.9%)     | 2,323 (79.4%)     |
| <b>ADG score</b>                                                      |                      |                   |                   |
|                                                                       | Mean $\pm$ SD        | 20.24 $\pm$ 17.02 | 21.83 $\pm$ 17.75 |
|                                                                       | Median (IQR)         | 17 (6-32)         | 19 (7-34)         |
| <b>RUB N (%)</b>                                                      |                      |                   |                   |
|                                                                       | 0                    | 561 (4.8%)        | 85 (2.9%)         |
|                                                                       | 1                    | 179 (1.5%)        | 49 (1.7%)         |
|                                                                       | 2                    | 1,058 (9.1%)      | 269 (9.2%)        |
|                                                                       | 3                    | 5,165 (44.6%)     | 1,168 (39.9%)     |
|                                                                       | 4                    | 1,914 (16.5%)     | 542 (18.5%)       |
|                                                                       | 5                    | 2,707 (23.4%)     | 813 (27.8%)       |
| <b>Number of days from index date to end of follow-up<sup>1</sup></b> |                      |                   |                   |
|                                                                       | Mean $\pm$ SD        | 75.78 $\pm$ 41.90 | 75.72 $\pm$ 41.88 |
|                                                                       | Median (IQR)         | 87 (41-111)       | 87 (41-111)       |

<sup>1</sup> Controls were censored on the date that their matched person with COVID-19 died or was censored

Abbreviations: ADG: Adjusted Diagnostic Group; IQR: Interquartile range; SD: standard deviation; RUB: Resource utilization band

#### d) Intensive Care Unit

| <b>Variable</b>                            | <b>Value</b>  | <b>Controls<br/>N=3,757</b> | <b>People with<br/>COVID-19<br/>N=944</b> |
|--------------------------------------------|---------------|-----------------------------|-------------------------------------------|
| <b>Age at index date</b>                   |               |                             |                                           |
|                                            | Mean $\pm$ SD | 62.91 $\pm$ 13.59           | 62.90 $\pm$ 13.60                         |
|                                            | Median (IQR)  | 63 (55-73)                  | 63 (55-73)                                |
| <b>Sex N (%)</b>                           |               |                             |                                           |
|                                            | Female        | 1,369 (36.4%)               | 345 (36.5%)                               |
|                                            | Male          | 2,388 (63.6%)               | 599 (63.5%)                               |
| <b>Neighbourhood income quintile N (%)</b> |               |                             |                                           |
|                                            | 1-lowest      | 1,060 (28.2%)               | 272 (28.8%)                               |

|                                                                 |                                     |                   |                   |
|-----------------------------------------------------------------|-------------------------------------|-------------------|-------------------|
|                                                                 | 2                                   | 834 (22.2%)       | 220 (23.3%)       |
|                                                                 | 3                                   | 719 (19.1%)       | 174 (18.4%)       |
|                                                                 | 4                                   | 601 (16.0%)       | 162 (17.2%)       |
|                                                                 | 5-highest                           | 543 (14.5%)       | 116 (12.3%)       |
| <b>Rural/Small Town N (%)</b>                                   |                                     |                   |                   |
|                                                                 | No                                  | 3,566 (94.9%)     | 908 (96.2%)       |
|                                                                 | Yes                                 | 191 (5.1%)        | 36 (3.8%)         |
| <b>Rural postal code N (%)</b>                                  |                                     |                   |                   |
|                                                                 | No                                  | 3,450 (91.8%)     | 901 (95.4%)       |
|                                                                 | Yes                                 | 307 (8.2%)        | 43 (4.6%)         |
| <b>Local Health Integration Network N (%)</b>                   |                                     |                   |                   |
|                                                                 | Erie St. Clair                      | 178 (4.7%)        | 30 (3.2%)         |
|                                                                 | South West                          | 144 (3.8%)        | 29 (3.1%)         |
|                                                                 | Waterloo Wellington                 | 148 (3.9%)        | 42 (4.4%)         |
|                                                                 | Hamilton Niagara<br>Haldimand Brant | 273 (7.3%)        | 68 (7.2%)         |
|                                                                 | Central West                        | 477 (12.7%)       | 109 (11.5%)       |
|                                                                 | Mississauga Halton                  | 341 (9.1%)        | 84 (8.9%)         |
|                                                                 | Toronto Central                     | 434 (11.6%)       | 140 (14.8%)       |
|                                                                 | Central West                        | 741 (19.7%)       | 199 (21.1%)       |
|                                                                 | Central East                        | 548 (14.6%)       | 150 (15.9%)       |
|                                                                 | South East                          | 51 (1.4%)         | 15 (1.6%)         |
|                                                                 | Champlain                           | 281 (7.5%)        | 51 (5.4%)         |
|                                                                 | North Simcoe Muskoka                | 75 (2.0%)         | 12 (1.3%)         |
|                                                                 | North East                          | 50 (1.3%)         | <=14              |
|                                                                 | North West                          | 16 (0.4%)         | NR                |
| <b>Residence at index date N (%)</b>                            |                                     |                   |                   |
|                                                                 | Long-term care                      | 269 (7.2%)        | 71 (7.5%)         |
|                                                                 | community                           | 3,488 (92.8%)     | 873 (92.5%)       |
| <b>ADG score</b>                                                |                                     |                   |                   |
|                                                                 | Mean $\pm$ SD                       | 14.27 $\pm$ 13.87 | 15.69 $\pm$ 15.33 |
|                                                                 | Median (IQR)                        | 10 (4-22)         | 12 (4-23)         |
| <b>RUB</b>                                                      | 0                                   | 252 (6.7%)        | 56 (5.9%)         |
|                                                                 | 1                                   | 90 (2.4%)         | 19 (2.0%)         |
|                                                                 | 2                                   | 471 (12.5%)       | 120 (12.7%)       |
|                                                                 | 3                                   | 1,943 (51.7%)     | 469 (49.7%)       |
|                                                                 | 4                                   | 520 (13.8%)       | 135 (14.3%)       |
|                                                                 | 5                                   | 481 (12.8%)       | 145 (15.4%)       |
| <b>Number of days of follow-up after Index date<sup>1</sup></b> |                                     |                   |                   |
|                                                                 | Mean $\pm$ SD                       | 69.72 $\pm$ 46.75 | 69.60 $\pm$ 46.80 |
|                                                                 | Median (IQR)                        | 77 (18-115)       | 76 (18-115)       |



<sup>1</sup> Controls were censored on the date that their matched person with COVID-19 died or was censored

Abbreviations: ADG, Adjusted Diagnostic Group; IQR, interquartile range; NR, not reportable due to small cell size (<5); RUB: Resource Utility Band; SD, standard deviation.

**Table S2.** Number and percentage of people with COVID-19 who were censored or died in each 30-day period in British Columbia and Ontario

|                      |                            | British Columbia              |                              |                              |                              |                               | Ontario                      |                             |                             |                               |                   |
|----------------------|----------------------------|-------------------------------|------------------------------|------------------------------|------------------------------|-------------------------------|------------------------------|-----------------------------|-----------------------------|-------------------------------|-------------------|
|                      |                            | Community                     | LTC                          | Hospital                     | ICU                          | TOTAL                         | Community                    | LTC                         | Hospital                    | ICU                           | TOTAL             |
| <b>Days 1 - 30</b>   | N people with $\geq 1$ day | 1752                          | 248                          | 326                          | 139                          | 2465                          | 20,545                       | 4,478                       | 2,926                       | 944                           | 28,893            |
|                      | N (%) died                 | 19<br>(1.1)                   | 81<br>(32.7)                 | 42<br>(12.9)                 | 21<br>(15.1)                 | 163<br>(6.6)                  | $\leq 101$<br>( $\leq 0.5$ ) | 1,209<br>(27.0)             | 637<br>(21.8)               | $\leq 304$<br>( $\leq 32.2$ ) | 2,247<br>(7.8)    |
|                      | N (%) censored             | 0<br>(0.0)                    | 0<br>(0.0)                   | 0<br>(0.0)                   | 0<br>(0.0)                   | 0<br>(0.0)                    | $\leq 5$<br>(0.0)            | 0<br>(0.0)                  | 0<br>(0.0)                  | 0<br>(0.0)                    | $\leq 5$<br>(0.0) |
| <b>Days 31 - 60</b>  | N people with $\geq 1$ day | 1733                          | 167                          | 284                          | 118                          | 2302                          | 20,443                       | 3,269                       | 2,289                       | 644                           | 26,645            |
|                      | N (%) died                 | $\leq 5$<br>( $\leq 0.3$ )    | 13<br>(7.8)                  | 10<br>(3.5)                  | $\leq 10$<br>( $\leq 8.5$ )  | $\leq 38$<br>( $\leq 1.7$ )   | 11<br>(0.05)                 | 90<br>(2.7)                 | 71<br>(3.1)                 | 55<br>(8.5)                   | 227<br>(0.85)     |
|                      | N (%) censored             | $\leq 202$<br>( $\leq 11.7$ ) | 16<br>(9.6)                  | 15<br>(5.3)                  | $\leq 5$<br>( $\leq 4.2$ )   | $\leq 238$<br>( $\leq 10.3$ ) | 3,667<br>(17.9)              | 173<br>(5.3)                | 205<br>(9.0)                | 44<br>(6.8)                   | 4,089<br>(15.3)   |
| <b>Days 61 - 90</b>  | N people with $\geq 1$ day | 1530                          | 138                          | 259                          | 107                          | 2034                          | 16,765                       | 3,006                       | 2,013                       | 545                           | 22,329            |
|                      | N (%) died                 | $\leq 5$<br>( $\leq 0.3$ )    | $\leq 5$<br>( $\leq 0.36$ )  | $\leq 5$<br>( $\leq 1.9$ )   | 0<br>(0.0)                   | $\leq 15$<br>( $\leq 0.7$ )   | 11<br>(0.07)                 | 41<br>(1.4)                 | 30<br>(1.5)                 | 8<br>(1.5)                    | 90<br>(0.4)       |
|                      | N (%) censored             | $\leq 239$<br>( $\leq 15.6$ ) | $\leq 27$<br>( $\leq 19.6$ ) | $\leq 18$<br>( $\leq 6.9$ )  | 6<br>(5.6)                   | $\leq 290$<br>( $\leq 14.3$ ) | 6,238<br>(37.2)              | 836<br>(27.8)               | 581<br>(28.9)               | 117<br>(21.5)                 | 7,772<br>(34.8)   |
| <b>Days 91 - 120</b> | N people with $\geq 1$ day | 1290                          | 110                          | 240                          | 101                          | 1741                          | 10,516                       | 2,129                       | 1,402                       | 420                           | 14,467            |
|                      | N (%) died                 | 6<br>(0.5)                    | $\leq 5$<br>( $\leq 4.5$ )   | $\leq 5$<br>( $\leq 2.1$ )   | $\leq 5$<br>( $\leq 5.0$ )   | $\leq 21$<br>( $\leq 1.2$ )   | $\leq 5$<br>( $\leq 0.05$ )  | $\leq 27$<br>( $\leq 1.3$ ) | $\leq 5$<br>( $\leq 0.36$ ) | $\leq 5$<br>( $\leq 1.2$ )    | 35<br>(0.2)       |
|                      | N (%) censored             | 543<br>(42.1)                 | $\leq 46$<br>( $\leq 41.8$ ) | $\leq 83$<br>( $\leq 34.6$ ) | $\leq 23$<br>( $\leq 23.0$ ) | $\leq 695$<br>( $\leq 39.9$ ) | 7,778<br>(74.0)              | 1,977<br>(92.9)             | 1,012<br>(72.2)             | 236<br>(56.2)                 | 11,003<br>(76.1)  |

People with COVID-19 were censored at the end of the observation period, July 31, 2020, or the end of their MSP or OHIP registration.

**Table S3.** Mean and median per person cost for each 30-day period before and after index date for people with COVID-19 by highest level of care, and matched controls, in a) British Columbia b) Ontario.

a) British Columbia

|                                      | People with<br>COVID-19 in<br>the<br>community | Controls for<br>people with<br>COVID-19 in<br>community | People with<br>COVID-19 in<br>LTC | Controls for<br>people with<br>COVID-19<br>in LTC | People with<br>COVID-19 in<br>hospital | Controls for<br>people with<br>COVID-19<br>in hospital | People with<br>COVID-19 in<br>ICU | Controls for<br>people with<br>COVID-19<br>in ICU |
|--------------------------------------|------------------------------------------------|---------------------------------------------------------|-----------------------------------|---------------------------------------------------|----------------------------------------|--------------------------------------------------------|-----------------------------------|---------------------------------------------------|
| <b>Pre-index (Day -30 to Day -1)</b> |                                                |                                                         |                                   |                                                   |                                        |                                                        |                                   |                                                   |
| <b>N</b>                             | 1,752                                          | 7,005                                                   | 248                               | 984                                               | 326                                    | 1,301                                                  | 139                               | 556                                               |
| <b>Mean cost</b>                     | 302                                            | 283                                                     | 5,545                             | 5,942                                             | 4,494                                  | 1,361                                                  | 1,749                             | 783                                               |
| <b>(95% CI)</b>                      | (209-395)                                      | (240-325)                                               | (5,334-5,757)                     | (5,609-6,276)                                     | (3,574-5,414)                          | (1,162-1,559)                                          | (884-2,613)                       | (517-1,048)                                       |
| <b>Median cost</b>                   | 35                                             | 0                                                       | 5,462                             | 5,440                                             | 499                                    | 145                                                    | 228                               | 84                                                |
| <b>(Q1-Q3)</b>                       | (0-155)                                        | (0-130)                                                 | (5,363-5,611)                     | (5,337-5,680)                                     | (139-5,401)                            | (0-598)                                                | (35-660)                          | (0-323)                                           |
| <b>Day 1 (Index date) to 30</b>      |                                                |                                                         |                                   |                                                   |                                        |                                                        |                                   |                                                   |
| <b>N</b>                             | 1,752                                          | 7,005                                                   | 248                               | 983                                               | 326                                    | 1,301                                                  | 139                               | 556                                               |
| <b>Mean cost</b>                     | 339                                            | 222                                                     | 4,842                             | 4,523                                             | 23,015                                 | 1,004                                                  | 66,324                            | 496                                               |
| <b>(95% CI)</b>                      | (305-373)                                      | (191-253)                                               | (4,219-5,465)                     | (4,277-4,768)                                     | (20,520-25,509)                        | (835-1,174)                                            | (58,946-73,702)                   | (311-680)                                         |
| <b>Median cost</b>                   | 149                                            | 0                                                       | 5,446                             | 5,330                                             | 15,402                                 | 100                                                    | 61,379                            | 40                                                |
| <b>(Q1-Q3)</b>                       | (58-401)                                       | (0-111)                                                 | (2,401-5,675)                     | (2,116-5,506)                                     | (12,313-25,880)                        | (0-446)                                                | (27,219-103,766)                  | (0-258)                                           |
| <b>Days 31 to 60</b>                 |                                                |                                                         |                                   |                                                   |                                        |                                                        |                                   |                                                   |
| <b>N</b>                             | 1,733                                          | 6,921                                                   | 167                               | 641                                               | 284                                    | 1,126                                                  | 118                               | 471                                               |
| <b>Mean cost</b>                     | 247                                            | 226                                                     | 5,719                             | 5,157                                             | 6,238                                  | 963                                                    | 18,483                            | 502                                               |
| <b>(95% CI)</b>                      | (181-313)                                      | (196-256)                                               | (4,537-6,900)                     | (4,851-5,463)                                     | (4,439-8,038)                          | (791-1,135)                                            | (13,266-23,699)                   | (282-722)                                         |
| <b>Median cost</b>                   | 32 (0-160)                                     | 0 (0-115)                                               | 5,434                             | 5,394                                             | 520                                    | 107                                                    | 935                               | 49                                                |
| <b>(Q1-Q3)</b>                       |                                                |                                                         | (5,311-5,640)                     | (4,275-5,571)                                     | (117-4,151)                            | (0-455)                                                | (276-31,923)                      | (0-230)                                           |
| <b>Days 61 to 90</b>                 |                                                |                                                         |                                   |                                                   |                                        |                                                        |                                   |                                                   |
| <b>N</b>                             | 1,530                                          | 6,106                                                   | 138                               | 520                                               | 259                                    | 1,026                                                  | 107                               | 426                                               |
| <b>Mean cost</b>                     | 224                                            | 242                                                     | 5,645                             | 5,297                                             | 3,059                                  | 882                                                    | 4,525                             | 426                                               |
| <b>(95% CI)</b>                      | (169-279)                                      | (213-271)                                               | (4,986-6,304)                     | (5,033-5,561)                                     | (1,761-4,357)                          | (721-1,043)                                            | (1,835-7,216)                     | (296-556)                                         |
| <b>Median cost</b>                   | 32                                             | 0                                                       | 5,443                             | 5,388                                             | 379                                    | 97                                                     | 842                               | 41                                                |
| <b>(Q1-Q3)</b>                       | (0-154)                                        | (0-126)                                                 | (5,316-5,572)                     | (4,947-5,629)                                     | (55-1,327)                             | (0-411)                                                | (183-1,432)                       | (0-260)                                           |
| <b>Days 91 to 120</b>                |                                                |                                                         |                                   |                                                   |                                        |                                                        |                                   |                                                   |

Appendix 2, as supplied by the authors. Appendix to: Tsui TCO, Zeitouny S, Bremner KE, et al. Initial health care costs for COVID-19 in British Columbia and Ontario, Canada: an interprovincial population-based cohort study. *CMAJ Open* 2022. doi:10.9778/cmajo.20210328. Copyright © 2022 The Author(s) or their employer(s). To receive this resource in an accessible format, please contact us at cmajgroup@cmaj.ca.

|                    |           |           |               |               |             |           |               |           |
|--------------------|-----------|-----------|---------------|---------------|-------------|-----------|---------------|-----------|
| <b>N</b>           | 1,290     | 5,141     | 110           | 406           | 240         | 946       | 101           | 402       |
| <b>Mean cost</b>   | 226       | 202       | 4,526         | 4,873         | 1,718       | 706       | 2,930         | 600       |
| <b>(95% CI)</b>    | (145-307) | (169-236) | (4,167-4,886) | (4,508-5,238) | (905-2,531) | (557-855) | (1,108-4,751) | (317-884) |
| <b>Median cost</b> | 0         | 0         | 5,380         | 5,332         | 236         | 73        | 322           | 41        |
| <b>(Q1-Q3)</b>     | (0-132)   | (0-102)   | (3,726-5,512) | (2,992-5,547) | (36-873)    | (0-344)   | (69-970)      | (0-234)   |

People with COVID-19 were observed from index date until death or censoring. Controls were censored on the date of death or censoring of their matched person with COVID-19. Costs in each 30-day period include only people with COVID-19 and controls who were under observation at the start of the period. Costs for the controls were weighted so each set of controls represented one person with COVID-19.

b) Ontario

|                                      | People with<br>COVID-19 in<br>community | Controls for<br>people with<br>COVID-19 in<br>Community | People with<br>COVID-19 in<br>LTC | Controls for<br>people with<br>COVID-19 in<br>LTC | People with<br>COVID-19 in<br>hospital | Controls for<br>people with<br>COVID-19 in<br>hospital | People with<br>COVID-19 in<br>ICU | Controls for<br>people with<br>COVID-19 in<br>ICU |
|--------------------------------------|-----------------------------------------|---------------------------------------------------------|-----------------------------------|---------------------------------------------------|----------------------------------------|--------------------------------------------------------|-----------------------------------|---------------------------------------------------|
| <b>Pre-index (Day -30 to Day -1)</b> |                                         |                                                         |                                   |                                                   |                                        |                                                        |                                   |                                                   |
| N                                    | 20,545                                  | 82,148                                                  | 4,478                             | 17,609                                            | 2,926                                  | 11,584                                                 | 944                               | 3,757                                             |
| Mean cost<br>(95% CI)                | 260<br>(239, 281)                       | 227<br>(221, 233)                                       | 4,836<br>(4,767, 4,905)           | 5,607<br>(5,573, 5,641)                           | 5,391<br>(5,028, 5,754)                | 1,787<br>(1,750, 1,824)                                | 3,446<br>(2,808, 4,084)           | 1,003<br>(929, 1,077)                             |
| Median cost<br>(IQR)                 | 0<br>(0-98)                             | 0<br>(0-39)                                             | 4,407<br>(4,306-4,594)            | 4,394<br>(4,298- 4,635)                           | 1,733<br>(159-5,100)                   | 125<br>(0-2,262)                                       | 330<br>(39-2,736)                 | 26<br>(0-274)                                     |
| <b>Days 1 (Index date) to Day 30</b> |                                         |                                                         |                                   |                                                   |                                        |                                                        |                                   |                                                   |
| N                                    | 20,545                                  | 82,148                                                  | 4,478                             | 17,609                                            | 2,926                                  | 11,584                                                 | 944                               | 3,757                                             |
| Mean cost<br>(95% CI)                | 381<br>(362, 400)                       | 220<br>(214, 226)                                       | 4,132<br>(4,053, 4,211)           | 4,475<br>(4,445, 4,505)                           | 17,050<br>(16,648, 17,452)             | 1317<br>(1,286, 1,348)                                 | 56,717<br>(54,349, 59,085)        | 652<br>(596, 706)                                 |
| Median cost<br>(IQR)                 | 90<br>(24-367)                          | 0<br>(0 -40)                                            | 4,361<br>(2,994-4,605)            | 4,317<br>(2,894-4,513)                            | 14,378<br>(10,228-22,391)              | 86<br>(0-906)                                          | 51,953<br>(22,658-87,797)         | 0<br>(0-156)                                      |
| <b>Days 31 to 60</b>                 |                                         |                                                         |                                   |                                                   |                                        |                                                        |                                   |                                                   |
| N                                    | 20,443                                  | 81,724                                                  | 3,269                             | 12,813                                            | 2,289                                  | 9,067                                                  | 644                               | 2,569                                             |
| Mean cost<br>(95% CI)                | 281<br>(254, 308)                       | 217<br>(211, 223)                                       | 5,058<br>(4,928, 5,188)           | 5,160<br>(5,124, 5,196)                           | 6,540<br>(6,094, 6,986)                | 1,335<br>(1,295, 1,375)                                | 22,847<br>(20,512, 25,182)        | 604<br>(536, 672)                                 |
| Median cost<br>(IQR)                 | 0<br>(0-85)                             | 0<br>(0-43)                                             | 4,390<br>(4,290-4,591)            | 4,366<br>(4,261- 4,593)                           | 617<br>(72-9,264)                      | 75<br>(0-714)                                          | 5,910<br>(204-40,551)             | 0<br>(0-141)                                      |
| <b>Days 61 to 90</b>                 |                                         |                                                         |                                   |                                                   |                                        |                                                        |                                   |                                                   |
| N                                    | 16,765                                  | 67,013                                                  | 3,006                             | 11,742                                            | 2,013                                  | 7,976                                                  | 545                               | 2,175                                             |
| Mean cost<br>(95% CI)                | 243<br>(218, 268)                       | 208<br>(202, 214)                                       | 4,658<br>(4,519, 4,797)           | 4,760<br>(4,723, 4,797)                           | 3,799<br>(3,457, 4,141)                | 1,229<br>(1,190, 1,268)                                | 9,299<br>(7,584, 11,014)          | 520<br>(475, 565)                                 |
| Median cost<br>(IQR)                 | 0<br>(0-70)                             | 0<br>(0-39)                                             | 4,316<br>(4,025-4,519)            | 4,316<br>(3,832-4,527)                            | 392<br>(39-3,339)                      | 69<br>(0-652)                                          | 393<br>(66-5,517)                 | 0<br>(0-157)                                      |
| <b>Days 91 to 120</b>                |                                         |                                                         |                                   |                                                   |                                        |                                                        |                                   |                                                   |
| N                                    | 10,516                                  | 42,040                                                  | 2,129                             | 8,266                                             | 1,402                                  | 5,556                                                  | 420                               | 1,674                                             |

|                    |            |            |                |                |                |            |                |            |
|--------------------|------------|------------|----------------|----------------|----------------|------------|----------------|------------|
| <b>Mean cost</b>   | 210        | 170        | 2,868          | 2,976          | 2,164          | 787        | 3,986          | 425        |
| <b>(95% CI)</b>    | (184, 236) | (164, 176) | (2,753, 2,983) | (2,942, 3,010) | (1,856, 2,472) | (745, 829) | (2,784, 5,188) | (378, 472) |
| <b>Median cost</b> | 0          | 0          | 2,617          | 2,616          | 202            | 37         | 254            | 0          |
| <b>(IQR)</b>       | (0-57)     | (0-33)     | (1,583-3,448)  | (1,457-3,490)  | (0-1,090)      | (0-417)    | (7-1,253)      | (0-107)    |

Abbreviations: ICU: intensive care unit; IQR; interquartile range; LTC: long term care; N: number; SD: standard deviation  
 People with COVID-19 were observed from index date until death or censoring. Controls were censored on the date of death or censoring of their matched person with COVID-19. Costs in each 30-day period include only people with COVID-19 and controls who were under observation at the start of the period. Costs for the controls were weighted so each set of controls represented one person with COVID-19.

**Table S4.** Mean cumulative net costs by level of care for people with COVID-19 in British Columbia and Ontario

|                               | British Columbia  |                         |                            |                             | Ontario           |                          |                            |                             |
|-------------------------------|-------------------|-------------------------|----------------------------|-----------------------------|-------------------|--------------------------|----------------------------|-----------------------------|
|                               | Community         | LTC                     | Hospital                   | ICU                         | Community         | LTC                      | Hospital                   | ICU                         |
| <b>Up to index date</b>       |                   |                         |                            |                             |                   |                          |                            |                             |
| <b>N</b>                      | 1,752             | 248                     | 326                        | 139                         | 20,545            | 4,478                    | 2,926                      | 944                         |
| <b>Mean net cost (95% CI)</b> | 19<br>(-77, 115)  | -397<br>(-805, 11)      | 3,133<br>(2,250, 4,016)    | 966<br>(140, 1,792)         | 34<br>(11, 57)    | -748<br>(-846, -650)     | 3,628<br>(3,263, 3,995)    | 2,493<br>(1,849, 3,136)     |
| <b>Up to day 30</b>           |                   |                         |                            |                             |                   |                          |                            |                             |
| <b>N</b>                      | 1,752             | 248                     | 326                        | 139                         | 20,545            | 4,478                    | 2,926                      | 944                         |
| <b>Mean net cost (95% CI)</b> | 130<br>(6, 254)   | -82<br>(-857, 692)      | 25,128<br>(22,439, 27,816) | 66,793<br>(59,409, 74,177)  | 195<br>(156, 235) | -1,073<br>(-1233, -913)  | 19,376<br>(18,760, 19,992) | 58,587<br>(56,116, 61,057)  |
| <b>Up to day 60</b>           |                   |                         |                            |                             |                   |                          |                            |                             |
| <b>N</b>                      | 1,530             | 138                     | 259                        | 107                         | 16,765            | 3,006                    | 2,013                      | 545                         |
| <b>Mean net cost (95% CI)</b> | 116<br>(-15, 247) | 484<br>(-1,676, 2,644)  | 30,217<br>(26,103, 34,332) | 86,612<br>(74,851, 98,372)  | 250<br>(190, 309) | -1,263<br>(-1,571, -955) | 25,164<br>(24,177, 26,151) | 85,439<br>(80,970, 89,908)  |
| <b>Up to day 90</b>           |                   |                         |                            |                             |                   |                          |                            |                             |
| <b>N</b>                      | 1,530             | 138                     | 259                        | 107                         | 16,765            | 3,006                    | 2,013                      | 545                         |
| <b>Mean net cost (95% CI)</b> | 128<br>(-47, 302) | -396<br>(-2,046, 1,254) | 32,309<br>(27,079, 37,539) | 85,644<br>(73,094, 98,194)  | 312<br>(227, 398) | -1,401<br>(-1,832, -970) | 27,091<br>(25,934, 28,248) | 91,138<br>(85,202, 97,073)  |
| <b>Up to day 120</b>          |                   |                         |                            |                             |                   |                          |                            |                             |
| <b>N</b>                      | 1,290             | 110                     | 240                        | 101                         | 10,516            | 2,129                    | 1,402                      | 420                         |
| <b>Mean net cost (95% CI)</b> | 96<br>(-129, 320) | -46<br>(-2,085, 1,993)  | 33,640<br>(27,607, 39,672) | 90,056<br>(76,146, 103,967) | 487<br>(353, 622) | -1,105<br>(-1,708, 502)  | 28,329<br>(26,705, 29,954) | 96,308<br>(89,162, 103,454) |

Abbreviations: CI, confidence interval; ICU, intensive care unit; LTC, long term care

People with COVID-19 were observed from index date until death or censoring. Controls were censored on the date of death or censoring of their matched person with COVID-19. Costs in each 30-day period include only people with COVID-19 and controls who were under observation at the start of the period. Mean net costs (mean difference between the cost for a person with COVID-19 and their matched controls) were estimated using generalized estimating equations to account for matched clusters. Costs for the controls were weighted so each set of controls represented one person with COVID-19.



**Table S5** - Mean net costs for people with COVID-19 during the first 30 days after index date, stratified by level of care and characteristics at index date, in British Columbia and Ontario

|                                         | British Columbia       |                         |                 | Ontario                |                         |                 |
|-----------------------------------------|------------------------|-------------------------|-----------------|------------------------|-------------------------|-----------------|
| Variable                                | N people with COVID-19 | Estimated mean net cost | 95%CI           | N people with COVID-19 | Estimated mean net cost | 95%CI           |
| <b>Level of care group</b>              |                        |                         |                 |                        |                         |                 |
| ICU                                     | 139                    | 65,828                  | (58,535-73,122) | 944                    | 56,088                  | (53,721-58,455) |
| Hospital                                | 326                    | 22,010                  | (19,512-24,509) | 2,926                  | 15,750                  | (15,354-16,147) |
| Long-Term Care                          | 248                    | 319                     | (-280-919)      | 4,478                  | -327                    | (-410--244)     |
| Community                               | 1,752                  | 117                     | (70-164)        | 20,545                 | 161                     | (140-183)       |
| <b>Age in years</b>                     |                        |                         |                 |                        |                         |                 |
| 0 to 19                                 | 101                    | 287                     | (-68-641)       | 1,337                  | 248                     | (151-345)       |
| 20 to 29                                | 248                    | 1,807                   | (468-3,145)     | 3,647                  | 547                     | (401-694)       |
| 30 to 39                                | 388                    | 2,020                   | (826-3,215)     | 3,678                  | 1,064                   | (829-1,300)     |
| 40 to 49                                | 359                    | 4,291                   | (2,508-6,073)   | 4,083                  | 2,058                   | (1,739-2,377)   |
| 50 to 59                                | 450                    | 4,406                   | (2,900-5,912)   | 5,053                  | 4,097                   | (3,673-4,520)   |
| 60 to 69                                | 304                    | 13,485                  | (9,814-17,155)  | 3,619                  | 6,837                   | (6,175-7,500)   |
| 70 to 79                                | 239                    | 21,250                  | (16,904-25,596) | 2,372                  | 8,914                   | (8,094-9,734)   |
| 80 to 89                                | 230                    | 9,227                   | (6,852-11,602)  | 3,024                  | 4,784                   | (4,374-5,193)   |
| 90 and older                            | 146                    | 3,595                   | (2,129-5,061)   | 2,080                  | 2,576                   | (2,277-2,876)   |
| <b>Sex</b>                              |                        |                         |                 |                        |                         |                 |
| Male                                    | 1372                   | 9,393                   | (7,870-10,917)  | 12,674                 | 4,752                   | (4,472-5,033)   |
| Female                                  | 1093                   | 4,613                   | (3,755-5,471)   | 16,219                 | 2,520                   | (2,360-2,680)   |
| <b>Income quintile</b>                  |                        |                         |                 |                        |                         |                 |
| 1 (lowest income)                       | 601                    | 7,381                   | (5,605-9,157)   | 8,232                  | 3,535                   | (3,252-3,818)   |
| 2                                       | 503                    | 5,430                   | (3,881-6,978)   | 6,457                  | 3,637                   | (3,299-3,975)   |
| 3                                       | 515                    | 6,969                   | (5,134-8,804)   | 5,820                  | 3,251                   | (2,937-3,566)   |
| 4                                       | 434                    | 5,837                   | (4,128-7,546)   | 4,409                  | 3,726                   | (3,313-4,138)   |
| 5 (highest income)                      | 383                    | 7,781                   | (5,296-10,265)  | 3,975                  | 3,309                   | (2,900-3,718)   |
| missing                                 | 29                     |                         |                 |                        |                         |                 |
| <b>Residence at index date</b>          |                        |                         |                 |                        |                         |                 |
| Long-term care                          | 288                    | 2,964                   | (1,737-4,191)   | 5,152                  | 1,916                   | (1,688-2,144)   |
| Homeless/shelter                        | NA                     | NA                      | NA              | 186                    | 7,405                   | (5,124-9,687)   |
| Home (community)                        | 2,177                  | 7,239                   | (6,312-8,165)   | 23,555                 | 3,802                   | (3,622-3,981)   |
| <b>Adjusted Diagnostic Groups score</b> |                        |                         |                 |                        |                         |                 |
| -40 to -20                              | 13                     | 1,511                   | (-1,093-4,115)  | 55                     | 1,394                   | (185-2,603)     |
| -19 to 0                                | 594                    | 2,674                   | (1,478-3,869)   | 6,363                  | 1,648                   | (1,411-1,886)   |

|          |       |        |                |        |       |               |
|----------|-------|--------|----------------|--------|-------|---------------|
| 1 to 20  | 1,376 | 7,408  | (6,239-8,577)  | 16,666 | 3,129 | (2,927-3,332) |
| 21 to 40 | 397   | 10,509 | (8,029-12,989) | 4,228  | 6,151 | (5,677-6,626) |
| 41 to 76 | 85    | 7,405  | (3,972-10,838) | 1,581  | 7,751 | (6,968-8,533) |

Abbreviations: CI, confidence interval; ICU, intensive care unit

People with COVID-19 were observed from index date until death or censoring. Controls were censored on the date of death or censoring of their matched person with COVID-19. Costs in each 30-day period include only people with COVID-19 and controls who were under observation at the start of the period. Mean net costs (mean difference between the cost for a person with COVID-19 and their matched controls) were estimated using generalized estimating equations to account for matched clusters. Costs for the controls were weighted so that each set of controls represented one person with COVID-19

## References

1. Coronavirus Disease (COVID-19) Case Definition and Related Coding. 2020; Available at: [https://www.popdata.bc.ca/COVID-19\\_case\\_definition](https://www.popdata.bc.ca/COVID-19_case_definition). Accessed May 26, 2021, 2021.
2. British Columbia Ministry of Health [creator]. BC COVID-19 Test Lab Data. Population Data BC [publisher]. Data Extract. MOH (2020). 2020; <http://www.popdata.bc.ca/data>.
3. eHealth Ontario. Ontario Laboratories Information System (OLIS) Standard. 2021; <https://ehealthontario.on.ca/en/standards/ontario-laboratories-information-system-standard>. Accessed June 13, 2021.
4. The Johns Hopkins ACG system. State of the Art Technology and a Tradition of Excellence in One Integrated Solution. White Paper - Applications. <https://www.johnshopkinssolutions.com/wp-content/uploads/2014/04/ACG-White-Paper-General-Dec-2012.pdf>() Accessed August 25, 2021.
5. Austin PC. Assessing balance in measured baseline covariates when using many-to-one matching on the propensity-score. *Pharmacoepidemiol Drug Saf*. 2008;17:1218-25.
6. Austin PC, Walraven C. The mortality risk score and the ADG score: two points-based scoring systems for the Johns Hopkins aggregated diagnosis groups to predict mortality in a general adult population cohort in Ontario, Canada. *Med Care*. 2011;49:940-7.
7. Population Centre and Rural Area Classification <https://www.statcan.gc.ca/eng/subjects/standard/pcrac/2016/introduction>. 2016. Accessed Nov 18, 2020.
8. Government of Canada. Statistics and research. Forward sortation area - Definition. . 2015; Available at: <https://www.ic.gc.ca/eic/site/bsf-osb.nsf/eng/br03396.html>.
9. Kralj B. Measuring rurality - RIO 2008\_basic: methodology and results. Toronto, Ontario: Ontario Medical Association; 2008.
10. Local Health Integration Network <http://www.lhins.on.ca/>. 2020. Accessed Nov 19, 2020.
11. CIHI. Hospital spending: Focus on the emergency department. 2020; Available at: <https://www.cihi.ca/sites/default/files/document/hospital-spending-highlights-2020-en.pdf>. Accessed June 27, 2021.
12. CIHI. Health Care Use at the End of Life in British Columbia. 2008; Available at: [https://secure.cihi.ca/free\\_products/EOL\\_Report\\_BC.pdf](https://secure.cihi.ca/free_products/EOL_Report_BC.pdf). Accessed June 27, 2021.
